# Supplementary material for: Virus-derived sequences from the transcriptomes of two snail vectors of schistosomiasis, Biomphalaria pfeifferi and Bulinus globosus from Kenya
Source: PeerJ journal article supplement (doi:10.7717/peerj.12290), 2021-11-15
Supplement: Table_S1.pdf [file Table_S1.pdf]

Supplementary Table 1: **Primers used for RT-PCR confirmation of assembled viral sequences**

| <b>Virus</b> | <b>Primer</b> | <b>Sequences (5'-3')</b> | <b>Location</b> | <b>Expected size of PCR product (bp)</b> |
|--------------|---------------|--------------------------|-----------------|------------------------------------------|
| BPV2         | BPV2F1        | GACCACGGAGGCATATCTATTG   | 7790-7811       | 339                                      |
|              | BPV2R1        | GGTTATACGAACCCTGCCTAAG   | 8107-8128       |                                          |
| BPV3         | BPV2F2        | GCATATCAGGATGGCAGGATAG   | 5513-5534       | 2543                                     |
|              | BPV2R2        | CTGGTAGAAGCAGCAAGGATAA   | 8038-8059       |                                          |
| BPV4         | BPV3F2        | CGCCTTTCGCTATCCTCTATTTT  | 1282-1304       | 2581                                     |
|              | BPV3R2        | GTAACGCTTGCC ACTTTGATAC  | 3115-3863       |                                          |
| BuGV1        | BPV4F1        | TAGGCCACATAGTGCTGATTAC   | 619-640         | 1765                                     |
|              | BPV4R1        | GGTTACGTGGAGGCTCTTATAC   | 2362-2383       |                                          |
| BuGV2        | BuGVF2        | TGTGGAGACAAGCCGTTATG     | 3933-3952       | 2162                                     |
|              | BuGVR2        | CGCATGAGACCGTAGTAGAAAG   | 6073-6094       |                                          |
