# Supplementary material for: Virus-derived sequences from the transcriptomes of two snail vectors of schistosomiasis, Biomphalaria pfeifferi and Bulinus globosus from Kenya
Source: PeerJ journal article supplement (doi:10.7717/peerj.12290), 2021-11-15
Supplement: Table_S2_revised.zip [file Table_S2_revised.zip]

## Sheet: Sheet1
Name	Accession number	Length(RNA)	Protein length	Hit gene	Hit virus	Accession	E value	Seq coverage	Similarity	Identity
Bpviral_seq_1	MT108495	3478	1097	nonstructural protein	Bivalve RNA virus G2	YP_009329819.1	0	100	96	93
Bpviral_seq_2	MT108496	1440	449	nonstructural protein	Wenzhou picorna-like virus 33	YP_009336909.1	0	100	91	84
Bpviral_seq_3	MT108497	541	180	nonstructural protein	Wenzhou picorna-like virus 33	YP_009336909.1	6e-70	86	50	74
Bpviral_seq_4	MT108498	340	112	nonstructural protein	Wenzhou picorna-like virus 33	YP_009336909.1	1e-56	100	87	81
Bpviral_seq_5	MT108499	320	106	nonstructural protein	Wenzhou picorna-like virus 33	YP_009336909.1	5e-67	100	99	95
Bpviral_seq_6	MT108500	2945	661	capsid proteins	Wenzhou picorna-like virus 33	YP_009336910.1	0	86	91	82
Bpviral_seq_7	MT108501	410	136	capsid proteins	Beihai picorna-like virus 78	APG76688.1	8e-14	97	49	36
Bpviral_seq_8	MT108502	677	225	nonstructural protein	Sanxia picoran-like virus 4	YP_009337691.1	4e-62	100	64	47
Bpviral_seq_9	MT108503	849	282	nonstructural protein	Sanxia picoran-like virus 4	YP_009337691.1	1e-111	98	74	60
Bpviral_seq_10	MT108504	463	153	nonstructural protein	Sanxia picoran-like virus 4	YP_009337691.1	7e-57	100	77	63
Bpviral_seq_11	MT108505	303	100	nonstructural protein	Sanxia picoran-like virus 4	YP_009337691.1	6e-47	100	87	74
Bpviral_seq_12	MT108506	364	121	capsid proteins	Hubei picorna-like virus 4	YP_009337257.1	0.36	58	47	31
Bpviral_seq_13	MT108507	275	91	nonstructural protein	Arivirus 2	AIS73139.1	1e-05	92	52	34
Bpviral_seq_14	MT108508	337	111	nonstructural protein	Sanxia picoran-like virus 4	YP_009337691.1	2e-36	100	82	69
Bpviral_seq_15	MT108509	273	90	nonstructural protein	Beihai picorna-like virus 15	YP_009330066.1	0.001	94	49	28
Bpviral_seq_16	MT108510	2662	841	structural protein	Sanxia picoran-like virus 4	YP_009337691.1	0	100	74	62
Bpviral_seq_17	MT108511	3624	845	capsid proteins	Cricket paralysis virus	AKA63264.1	1e-20	89	37	23
Bpviral_seq_18	MT108512	1225	408	polyprotein	Beihai picorna-like virus 57	YP_009345913.1	4e-22	96	40	26
Bpviral_seq_19	MT108513	245	81	VP4 protein	Shahe picorna-like virus 11	YP_009336883.1	0.0006	98	50	31
Bpviral_seq_20	MT108514	1884	627	nonstructural protein	Wenzhou picorna-like virus 52	YP_009336661.1	1e-39	95	42	24
Bpviral_seq_21	MT108515	491	163	nonstructural protein	Sanxia picoran-like virus 4	YP_009337691.1	1e-55	99	73	62
Bpviral_seq_22	MT108516	309	102	nonstructural protein	Wenzhou picorna-like virus 21	YP_009337080.1	0.006	38	71	49
Bpviral_seq_23	MT108517	384	128	capsid proteins	Sanxia picorna-like virus 9	YP_009337756.1	6e-13	78	44	41
Bpviral_seq_24	MT108518	284	95	capsid proteins	Beihai picorna-like virus 57	YP_009345913.1	9e-07	93	40	31
Bpviral_seq_25	MT108519	203	68	nonstructural protein	Hubei leech virus 3	YP_009336521.1	9e-21	95	83	68
Bpviral_seq_26	MT108520	589	196	capsid proteins	Shahe picorna-like virus 1	YP_009336912.1	9e-14	85	46	26
Bpviral_seq_27	MT108521	255	84	nonstructural protein	Beihai picorna-like virus 39	YP_009333481.1	0.015	61	61	38
Bpviral_seq_28	MT108522	487	162	capsid proteins	Sanxia picorna-like virus 9	YP_009337756.1	4e-65	100	77	64
Bpviral_seq_29	MT108523	452	115	capsid proteins	Sanxia picorna-like virus 9	YP_009337756.1	5e-17	86	60	45
Bpviral_seq_30	MT108524	232	77	capsid proteins	Sanxia picorna-like virus 9	YP_009337756.1	5e-23	100	76	57
Bpviral_seq_31	MT108525	213	70	capsid proteins	ubei picorna-like virus 3	YP_009345030.1	4e-12	98	72	50
Bpviral_seq_32	MT108526	204	68	capsid proteins	Beihai picorna-like virus 48]	YP_009333545.1	1e-06	92	55	38
Bpviral_seq_33	MT108527	3240	842	capsid proteins	Marine RNA virus SF-2	AGZ83340.2	0	98	57	48
Bpviral_seq_34	MT108528	956	318	nonstructural protein	Marine RNA virus SF-2	AGZ83339.2	1e-90	100	65	49
Bpviral_seq_35	MT108529	703	234	nonstructural protein	Marine RNA virus SF-2	AGZ83339.2	2e-90	100	75	62
Bpviral_seq_36	MT108530	310	103	nonstructural protein	Marine RNA virus SF-2	AGZ83339.2	4e-26	100	68	50
Bpviral_seq_37	MT108531	947	315	nonstructural protein	Marine RNA virus SF-2	AGZ83339.2	3e-88	98	64	47
Bpviral_seq_38	MT108532	379	126	capsid proteins	Marine RNA virus SF-2	AGZ83340.2	3e-16	90	63	50
Bpviral_seq_39	MT108533	358	118	capsid proteins	Marine RNA virus SF-2	AGZ83339.2	2e-36	99	74	55
Bpviral_seq_40	MT108534	470	156	capsid proteins	Wenzhou picorna-like virus 33	YP_009336910.1	2e-26	66	92	77
Bpviral_seq_41	MT108535	267	89	polyprotein	Changjiang picorna-like virus 12	YP_009336582.1	3e-05	78	57	37
Bpviral_seq_42	MT108536	2757	900	capsid proteins	Beihai picorna-like virus 23	APG78947.1	7e-12	84	47	36
Bpviral_seq_43	MT108537	1949	563	capsid proteins	Changjiang crawfish virus 4	YP_009330008.1	7e-72	94	49	31
Bpviral_seq_44	MT108538	1335	374	capsid proteins	Shahe picorna-like virus 10	YP_009336819.1	4e-22	96	42	29
Bpviral_seq_45	MT108539	338	112	nonstructural protein	Beihai hypo-like virus 1	YP_009333297.1	2e-52	100	48	77
Bpviral_seq_46	MT108540	657	218	hypothetical protein	uncultured marine virus	AGA18405.1	0.19	75	43	25
Bpviral_seq_47	MT108541	311	103	hypothetical protein	uncultured marine virus	AGA18405.1	0.31	69	52	28
Bpviral_seq_48	MT108542	2969	989	polyprotein	Beihai hypo-like virus 1	YP_009333297.1	0	95	65	50
Bpviral_seq_49	MT108543	922	307	unnamed protein product	Beihai hypo-like virus 1	YP_009333297.1	4e-148	100	85	71
Bpviral_seq_50	MT108544	294	97	hypothetical protein FgHV1gp2	Beihai hypo-like virus 1	YP_009333297.1	2e-08	62	65	41
Bpviral_seq_51	MT108545	206	68	gp1	Picalivirus D	AHA44481.2	3e-08	83	64	47
Bpviral_seq_52	MT108546	250	83	glycoprotein precursor	Puumala virus	AFQ60666.1	0.25	92	49	34
Bpviral_seq_53	MT108547	985	297	hypothetical protein	Lake Sarah-associated circular virus-28	YP_009237569.1	2e-29	95	47	31
Bpviral_seq_54	MT108548	203	67	polyprotein	Currant latent virus	AHN52254.1	1e-05	95	57	39
BuG_virus2_F1	MT108493	1529	509	VP2	Biomphalaria virus 1	APS85749.1	3e-101	60	70	54
BuG_virus2_F2	MT108494	5278	540	ORF2_nonstructural protein	Biomphalaria virus 1	APS85749.1	0	98	75	62
			893	CP	Biomphalaria virus 1	YP_009336638.1	1e-71	86	53	34
